# Supplementary material
Source: PubMed Central journal article supplement (PMC5683713)
Supplement: NIHMS871310-supplement-Supplementary_Figures.pdf [file NIHMS871310-supplement-Supplementary_Figures.pdf]

# **Crimped Nanofibrous Biomaterials Mimic Microstructure and Mechanics of Native Tissue and Alter Strain Transfer to Cells**

Spencer E. Szczesny<sup>1#</sup>, Tristan P. Driscoll<sup>1,2#</sup>, Hsiao-Yun Tseng<sup>3</sup>, Pang-Ching Liu<sup>3</sup>, Su-Jin Heo<sup>1,2</sup>, Robert L. Mauck<sup>1,2</sup>, Pen-Hsiu G. Chao<sup>3\*</sup>

<sup>1</sup>McKay Orthopaedic Research Laboratory, Department of Orthopaedic Surgery, Perelman School of Medicine, University of Pennsylvania, Philadelphia, PA

<sup>2</sup>Department of Bioengineering, University of Pennsylvania, Philadelphia, PA

<sup>3</sup>National Taiwan University School of Medicine and School of Engineering, Taipei, Taiwan

# Contributed equally to this work.

**\*Address for Correspondence:**

Pen-hsiu G. Chao, Ph.D.  
Associate Professor of Biomedical Engineering  
National Taiwan University  
510 YongLin Building  
49 Fanglan Road  
Taipei, Taiwan 106  
Phone: 886.2.2732.8014  
Email: [pgchao@ntu.edu.tw](mailto:pgchao@ntu.edu.tw)

Number of pages: 2

Number of figures: 1

## Supplementary Figures

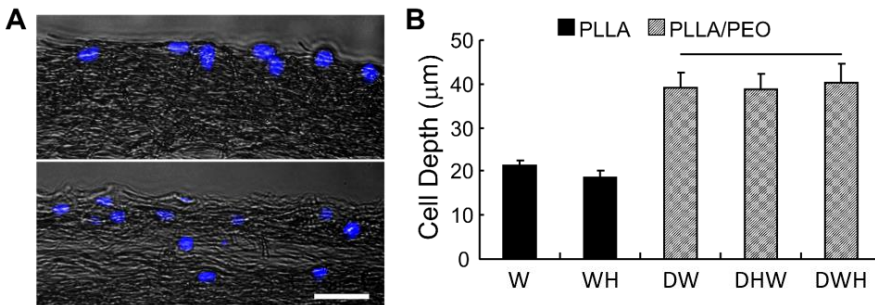

Figure S1. Effect of scaffold treatment on cell infiltration. (A) Representative image of cell infiltration. Blue: cell nucleus, Scale bar = 50 µm. (B) Washing out the PEO fibers significantly increased cell infiltration depth, which is indicative of an increase in scaffold porosity. (line:  $p < 0.01$  vs PLLA groups)
